# Supplementary material for: Synthesis of polyisocyanurate prepolymer and the resulting flexible elastomers with tunable mechanical properties
Source: Royal Society of Chemistry journal article supplement (doi:10.1039/d3py00124e), 2023-01-01
Supplement: d3py00124e1.pdf [file d3py00124e1.pdf]

Supporting information for

**Synthesis of polyisocyanurate prepolymer and the resulting  
flexible elastomers with tunable mechanical properties**

Yunfei Guo,<sup>a</sup> Julian Kleemann,<sup>c</sup> Stefan Bokern,<sup>c</sup> Andre Kamm,<sup>c,d</sup> Rint P. Sijbesma<sup>a,b\*</sup> and Željko Tomović<sup>a,b\*</sup>

<sup>a</sup>Department of Chemical Engineering and Chemistry, Eindhoven University of Technology, 5600 MB Eindhoven, The Netherlands;

<sup>b</sup>Institute for Complex Molecular Systems, Eindhoven University of Technology, 5600 MB Eindhoven, The Netherlands;

<sup>c</sup>BASF Polyurethanes GmbH, Elastogranstraße 60, 49448 Lemförde, Germany

<sup>d</sup>Present address: Department of Mechanical Engineering, Kiel University of Applied Sciences, Grenzstrasse 3, 24149 Kiel, Germany

## Contents

|                                                |    |
|------------------------------------------------|----|
| 1. Synthesis of PIR prepolymer .....           | 3  |
| 2. Preparation of elastomers in solution ..... | 9  |
| 3. Preparation of elastomers in bulk .....     | 10 |

## 1. Synthesis of PIR prepolymer

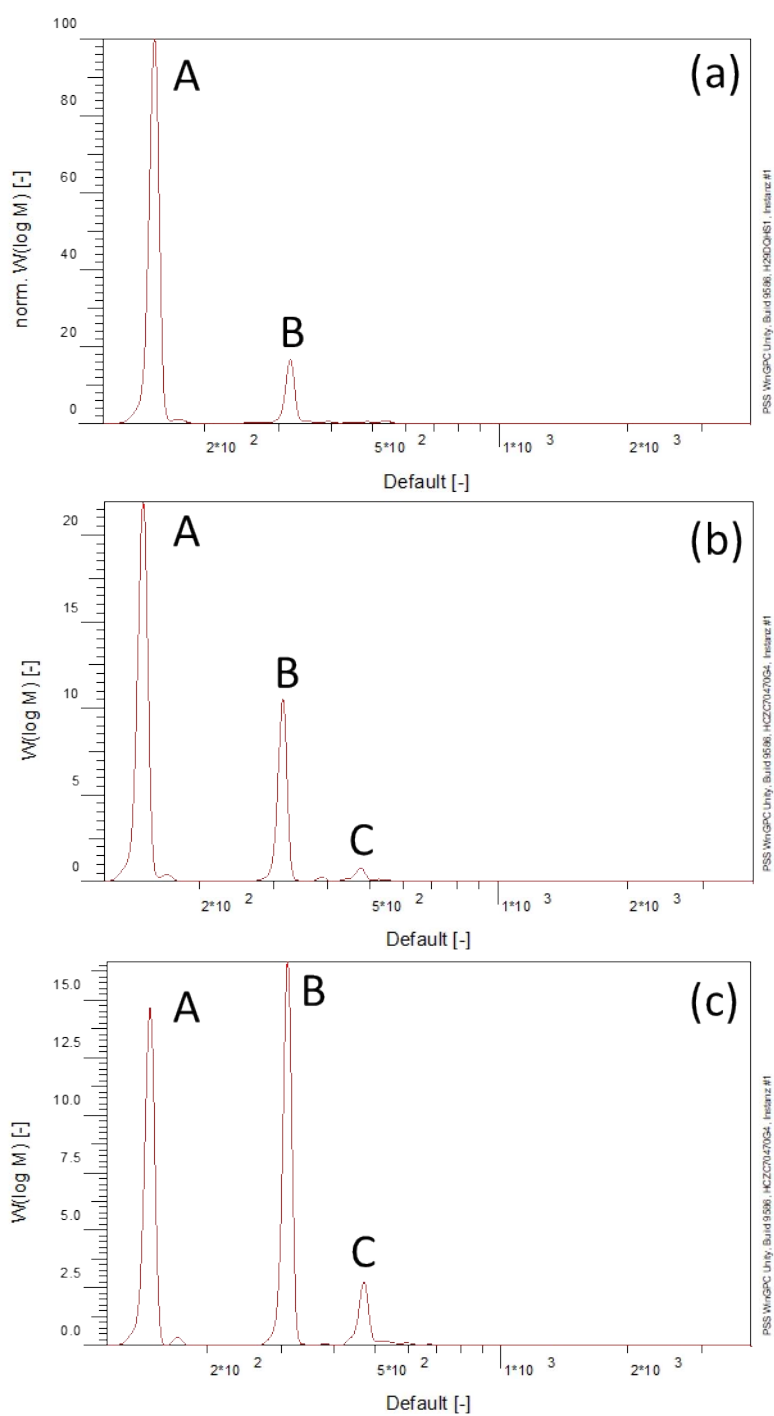

Fig. S1 GPC traces of reaction between 4,4'-MDI and 2-ethyl-1-hexanol in (a) 1:0.10; (b) 1:0.25; (c) 1:0.50 molar ratio.

Table S1 Molar percentage of different structures according to GPC results after reaction between 4,4'-MDI and 2-ethyl-1-hexanol in different molar ratio.

| MDI:OH ratio | A<br>Monomer | B<br>mono-urethane | C<br>di-urethane |
|--------------|--------------|--------------------|------------------|
| 1:0.10       | 0.90         | 0.10               | 0.00             |
| 1:0.25       | 0.77         | 0.21               | 0.02             |
| 1:0.50       | 0.58         | 0.37               | 0.05             |

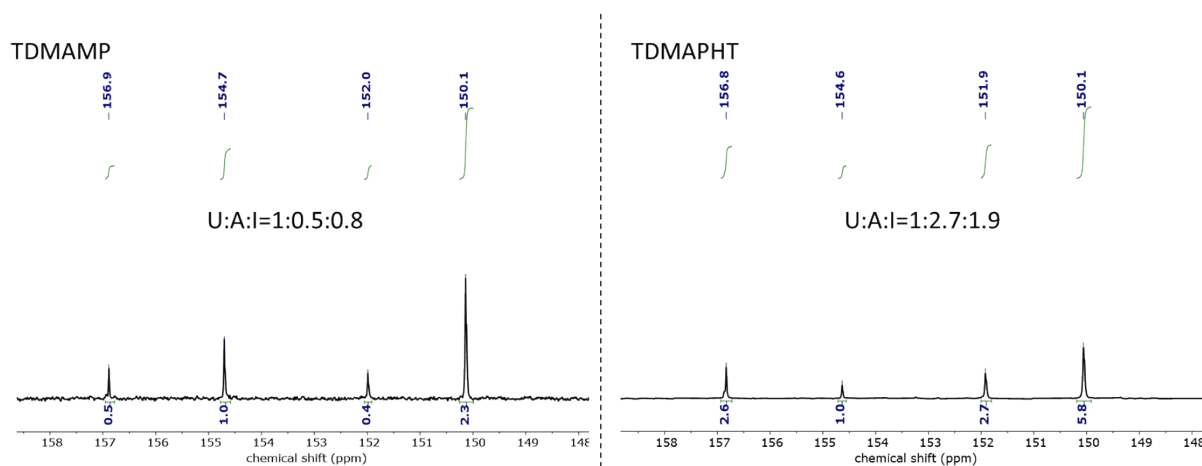

Fig. S2  $^{13}\text{C}$  NMR spectra (100MHz, acetone- $d_6$ ) of synthesized PIR prepolymer using TDMAMP or TDMAPHT as trimerization catalyst. The molar ratio of allophanate to isocyanurate was 0.6:1 and 1.4:1 respectively.

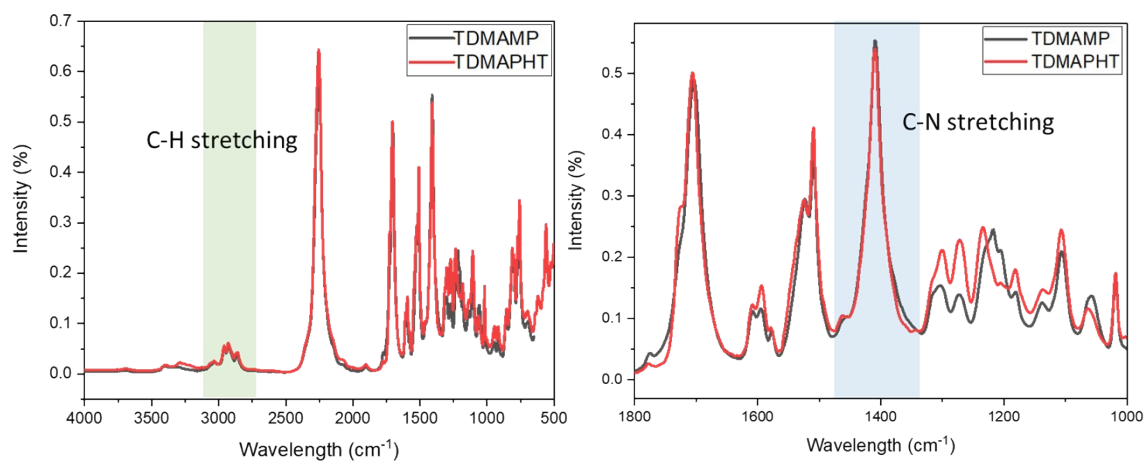

Fig. S3 FT-IR spectra of PIR prepolymer using TDMAMP or TDMAPHT as trimerization catalyst. After normalization based on the area of C-H stretching ( $3110\text{-}2770\text{ cm}^{-1}$ ) of TDMAMP curve, the area of isocyanurate C-N stretching ( $1474\text{-}1338\text{ cm}^{-1}$ ) was 16.8 and 14.8 respectively, which means that more isocyanurate was formed when TDMAMP was used as trimerization catalyst.

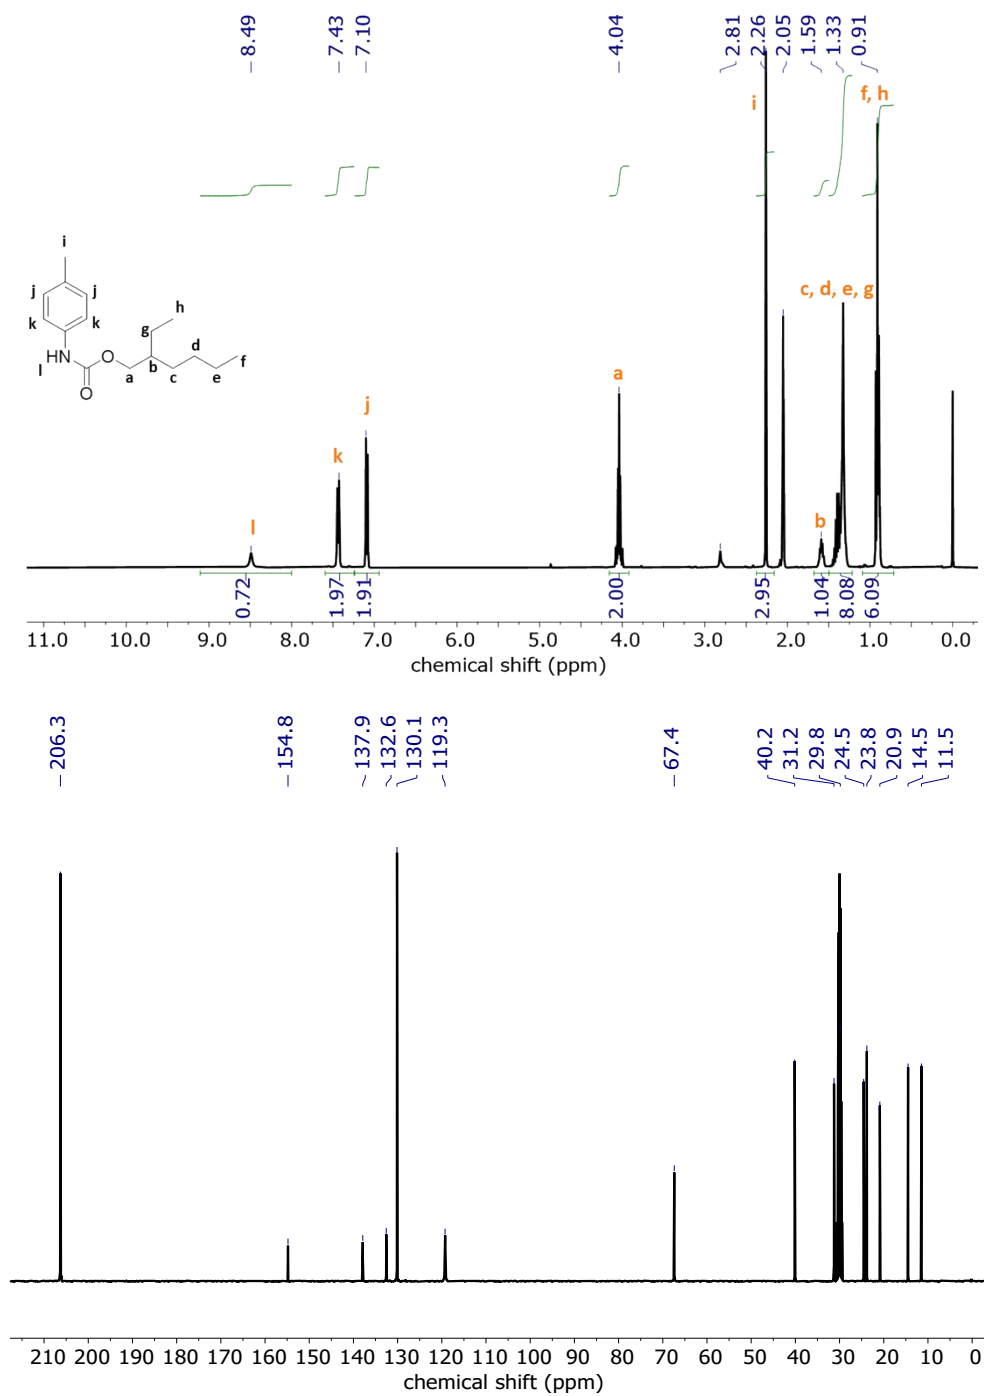

Fig. S4 <sup>1</sup>H NMR spectra (400 MHz, acetone-*d*<sub>6</sub>) and <sup>13</sup>C NMR spectra (100 MHz, acetone-*d*<sub>6</sub>) of 2-ethylhexyl *p*-tolylcarbamate.

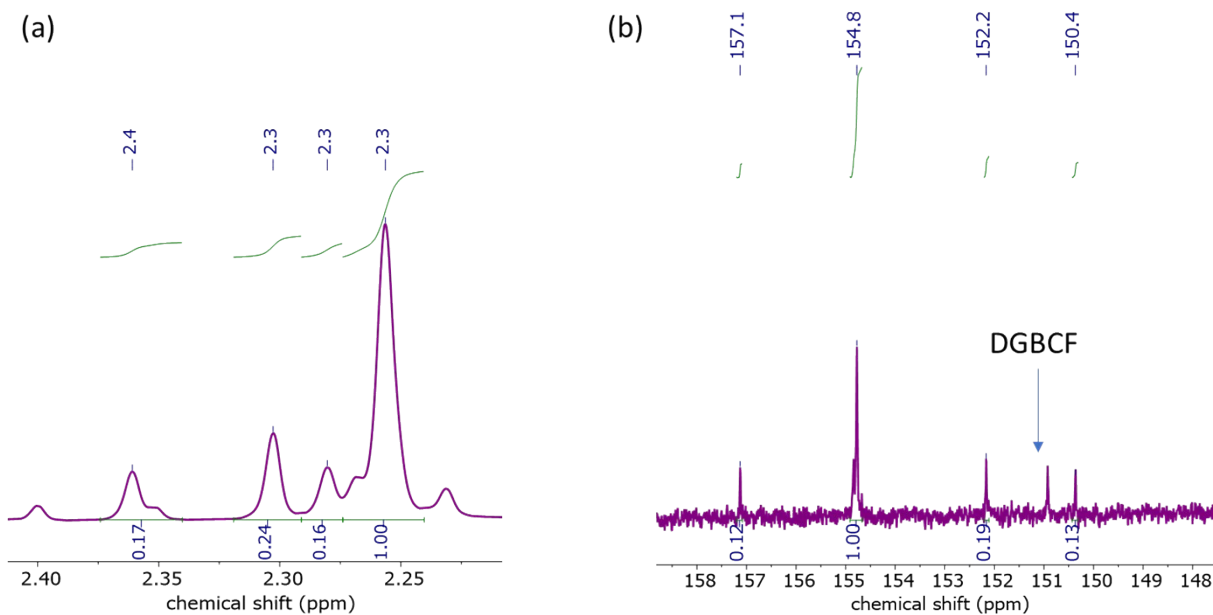

Fig. S5 (a)  $^1\text{H}$  NMR spectra (400 MHz, acetone- $d_6$ ) and (b) quantitative  $^{13}\text{C}$  NMR spectra (125 MHz, acetone- $d_6$ ) of product obtained from reaction between *p*-tolyl isocyanate and 2-ethylhexyl *p*-tolylcarbamate in 1:1 molar ratio in acetone- $d_6$  at 50 °C using 5 mol% TDMAMP as catalyst after 34 h.

According to the  $^1\text{H}$  NMR spectra in Fig. S5a, the remaining allophanate can be calculated as:

$$\frac{0.16}{0.17/3 + 0.25 + 0.16 + (1 - 0.16)} = 12 \text{ mol\%}$$

Assume at  $t=0$ , there were 1mol urethane and 1mol isocyanate. At  $t=34$  h, according to the  $^{13}\text{C}$  NMR spectra in Fig. S5b, the molar ratio of urethane:allophante:isocyanurate is 1:0.16:0.04.

The obtained allophanate is  $\frac{0.16}{1 + 0.16} \times 1 \text{ mol} = 0.14 \text{ mol}$ , remaining urethane is  $1 - 0.14 = 0.86 \text{ mol}$ .

The obtained isocyanurate is  $\frac{0.14}{0.16} \times 0.04 = 0.04 \text{ mol}$ , remaining isocyanate is  $1 - 0.14 \times 1 - 0.04 \times 3 = 0.74 \text{ mol}$ .

Therefore, the remaining allophanate can be calculated as:  $\frac{0.14}{0.14 + 0.86 + 0.04 + 0.74} = 8 \text{ mol\%}$ .

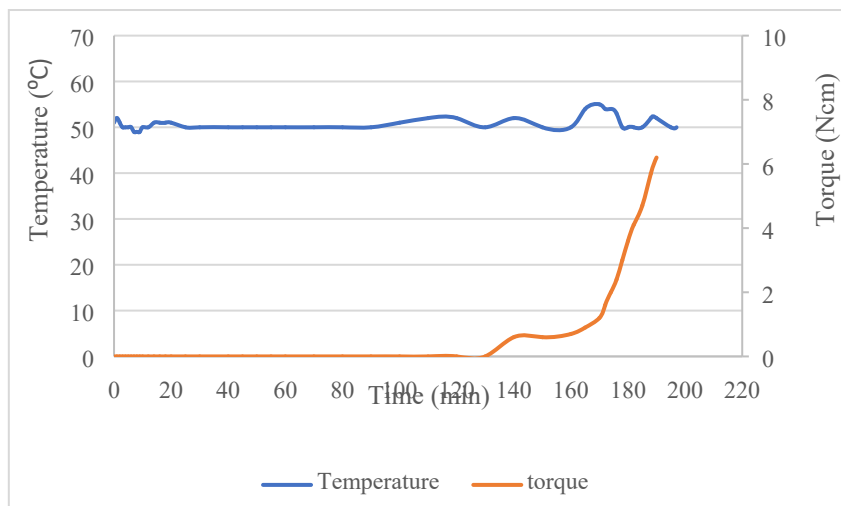

Fig. S6 Real-time temperature and torque during the synthesis of PIR prepolymer.

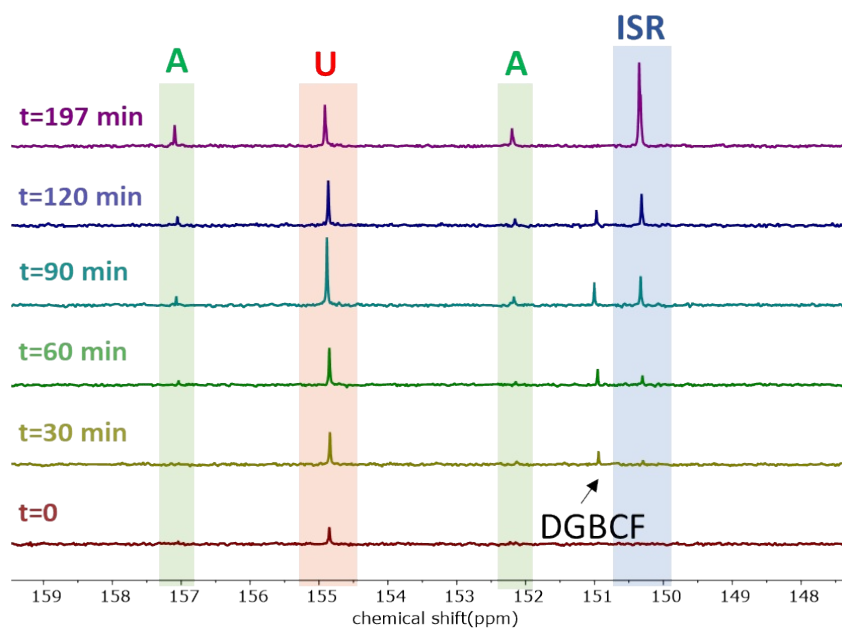

Fig. S7  $^{13}\text{C}$  NMR spectra (100 MHz, acetone- $d_6$ ) of the co-trimerization of mono- and di-functional isocyanates. U (carbamate); A (allophanate); ISR (isocyanurate).

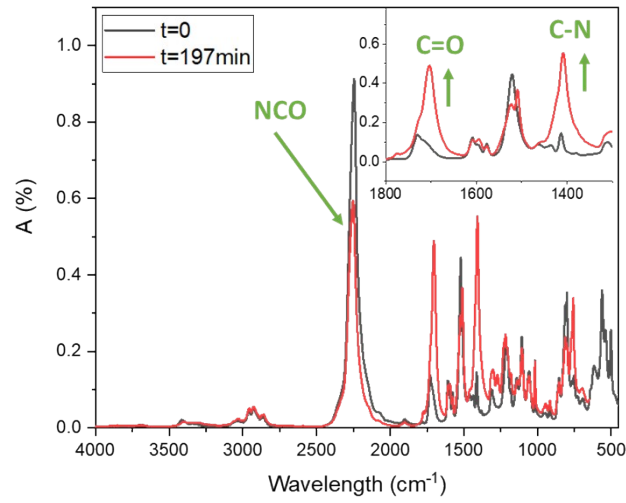

Fig. S8 FT-IR spectra of PIR prepolymer.

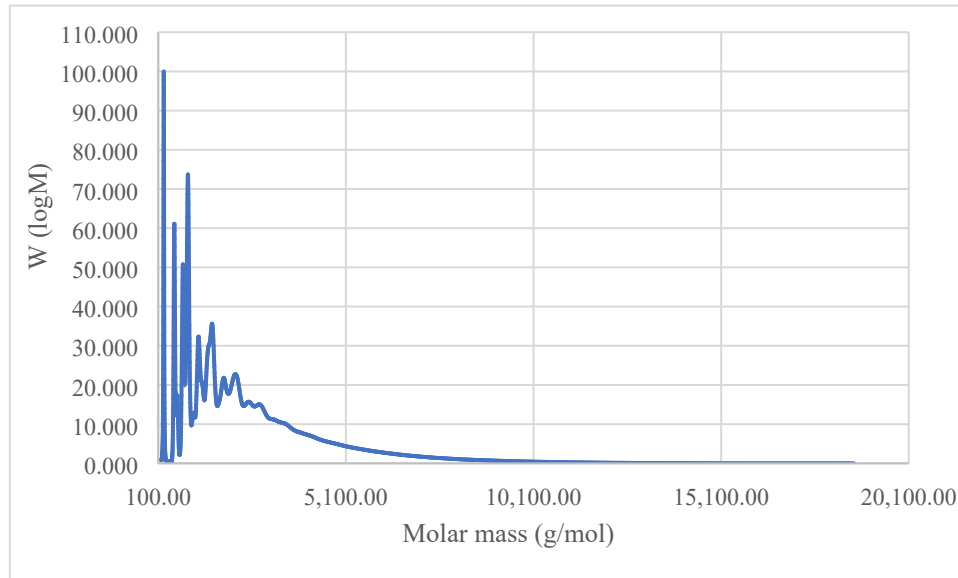

Fig. S9 GPC trace of PIR prepolymer, obtained  $M_n=660$  g/mol.

Based on the GPC result, the functionality of the PIR-DEHP prepolymer can be calculated using the following equation:

$$NCO \text{ content} = \frac{f_n \times n_{prepolymer} \times M_{NCO}}{n_{prepolymer} \times M_{prepolymer}},$$

$$f_n = \frac{NCO \text{ content} \times n_{prepolymer} \times M_{prepolymer}}{n_{prepolymer} \times M_{NCO} \times 100\text{wt}\%} = \frac{16 \text{ wt}\% \times 660 \text{ g/mol}}{42 \text{ g/mol} \times 100\text{wt}\%} = 2.5,$$

where  $n_{prepolymer}$  is the mole amount of prepolymer,  $M_{NCO}$  is the molecular weight of NCO group,  $M_{prepolymer}$  is the number average molecular weight of prepolymer.



## 2. Preparation of elastomers in solution

Table S2 Recipes (by weight percentage) of solution-casted elastomers (Index 105).

| BDO in polyol component | PIR elastomers |        |         |         | 4,4'-MDI based elastomer | M20 elastomers |         |
|-------------------------|----------------|--------|---------|---------|--------------------------|----------------|---------|
|                         | 0% BDO         | 5% BDO | 10% BDO | 15% BDO | 15% BDO                  | 0% BDO         | 15% BDO |
| PIR prepolymer          | 21.7           | 36.3   | 46.3    | 53.6    | --                       | --             | --      |
| 4,4'-MDI                | --             | --     | --      | --      | 35.4                     | --             | --      |
| M20                     | --             | --     | --      | --      | --                       | 12.3           | 36.9    |
| PTHF/ PESOL             | 78.3           | 60.5   | 48.3    | 39.4    | 54.9                     | 87.7           | 53.6    |
| BDO                     | --             | 3.2    | 5.4     | 7.0     | 9.7                      | --             | 9.5     |

The PIR prepolymer is trimerized from a mixture containing 184 g 4,4'-MDI and 24 g 2-ethyl-1-hexanol, which means that there is 88.5 wt% isocyanate contained in PIR prepolymer. The aromatic content of PIR elastomers with 15% BDO, for example, can be calculated as:  $53.6\% \times 88.5\% = 47\%$ . The aromatic content of 4,4'-MDI based elastomer and M20 elastomers is the amount of isocyanate that was used.

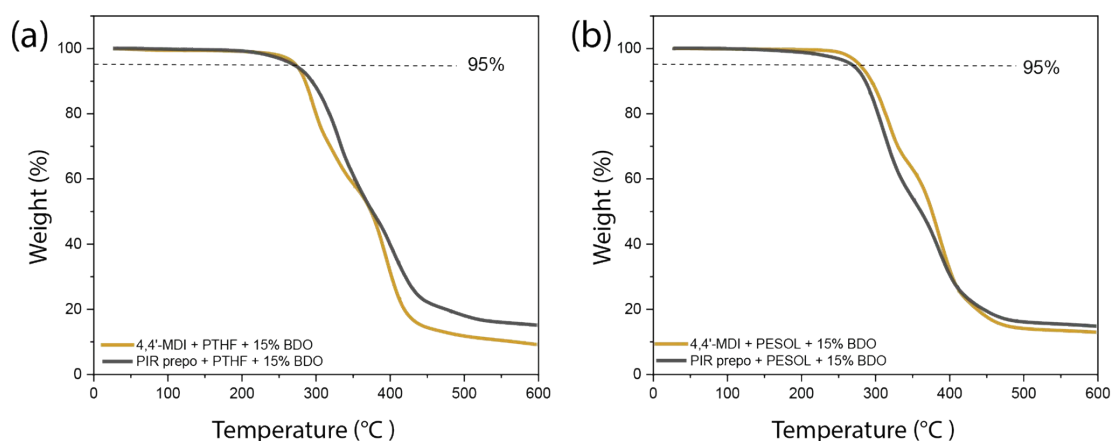

Fig. S10 TGA curves of PIR elastomers compared to classical elastomers which are obtained from the reaction of 4,4'-MDI, polyol and BDO without trimerization. All the elastomers contain 15 wt% BDO (a: PTHF-containing; b: PESOL-containing).

Table S3 TGA results of PIR elastomers compared to classical elastomers which are obtained from reaction of 4,4'-MDI, polyol and BDO without trimerization.

|                               | Aromatic content*<br>(wt%) | $T_{d5}$ (°C) | $T_{d10}$ (°C) | Char at 596 °C (%) |
|-------------------------------|----------------------------|---------------|----------------|--------------------|
| PIR prepoly + PTHF +15% BDO   | 47                         | 270.1         | 294.2          | 15.2               |
| 4,4'-MDI + PTHF + 15% BDO     | 35                         | 272.7         | 285.2          | 9.3                |
| PIR prepoly + PESOL + 15% BDO | 47                         | 268.5         | 286.2          | 14.9               |

---

|                            |    |       |       |      |
|----------------------------|----|-------|-------|------|
| 4,4'-MDI + PESOL + 15% BDO | 35 | 278.5 | 294.5 | 13.0 |
|----------------------------|----|-------|-------|------|

---

\*The aromatic content is calculated based on the weight percentage of aromatic isocyanate in the elastomers.

### 3. Preparation of elastomers in bulk

Table S4 Recipes (by weight percentage) of bulk-cast elastomers (Index 105).

| BDO in polyol component | PIR       |            |            | M20        |
|-------------------------|-----------|------------|------------|------------|
|                         | 5 wt% BDO | 10 wt% BDO | 15 wt% BDO | 15 wt% BDO |
| PIR prepolymer          | 35.5      | 45.5       | 52.8       | --         |
| M20                     | --        | --         | --         | 36.9       |
| PESOL                   | 61.3      | 49.1       | 40.1       | 53.6       |
| BDO                     | 3.2       | 5.4        | 7.1        | 9.5        |
